# Supplementary material
Source: publisher site journal article supplement (https://www.e-cmh.org/upload/media/cmh-2016-0086-suppl.pdf)
Supplement: Supplementary file 1 [file cmh-2016-0086-suppl.pdf]

**Supplementary Table 1.** Five-year probability of HCC development according to risk score

| Risk score | 5-year probability of HCC development (%) | Risk score | 5-year probability of HCC development (%) |
|------------|-------------------------------------------|------------|-------------------------------------------|
| 18         | 0.175353                                  | 67         | 5.930897                                  |
| 23         | 0.251824                                  | 68         | 6.362141                                  |
| 25         | 0.29104                                   | 69         | 6.823589                                  |
| 26         | 0.312878                                  | 70         | 7.317179                                  |
| 27         | 0.336352                                  | 71         | 7.844947                                  |
| 28         | 0.361584                                  | 72         | 8.409026                                  |
| 29         | 0.388705                                  | 73         | 9.011646                                  |
| 30         | 0.417856                                  | 74         | 9.655132                                  |
| 31         | 0.449188                                  | 75         | 10.3419                                   |
| 32         | 0.482864                                  | 76         | 11.07446                                  |
| 33         | 0.519059                                  | 77         | 11.8554                                   |
| 34         | 0.557958                                  | 78         | 12.68738                                  |
| 35         | 0.599764                                  | 79         | 13.57312                                  |
| 36         | 0.644692                                  | 80         | 14.51541                                  |
| 37         | 0.692974                                  | 81         | 15.51706                                  |
| 38         | 0.744859                                  | 82         | 16.5809                                   |
| 39         | 0.800612                                  | 83         | 17.70975                                  |
| 40         | 0.860521                                  | 84         | 18.90639                                  |
| 41         | 0.924891                                  | 85         | 20.17357                                  |
| 42         | 0.994052                                  | 86         | 21.51389                                  |
| 43         | 1.068358                                  | 87         | 22.92985                                  |
| 44         | 1.148185                                  | 88         | 24.42374                                  |
| 45         | 1.233939                                  | 89         | 25.99761                                  |
| 46         | 1.326055                                  | 90         | 27.65321                                  |
| 47         | 1.424999                                  | 91         | 29.39194                                  |
| 48         | 1.531267                                  | 92         | 31.21476                                  |
| 49         | 1.645394                                  | 93         | 33.1221                                   |
| 50         | 1.76795                                   | 94         | 35.11383                                  |
| 51         | 1.899546                                  | 95         | 37.18912                                  |
| 52         | 2.040836                                  | 96         | 39.34638                                  |
| 53         | 2.192516                                  | 97         | 41.58319                                  |
| 54         | 2.355334                                  | 98         | 43.89617                                  |
| 55         | 2.530086                                  | 99         | 46.28091                                  |
| 56         | 2.717622                                  | 100        | 48.73191                                  |
| 57         | 2.918849                                  | 101        | 51.2425                                   |
| 58         | 3.134735                                  | 102        | 53.80479                                  |
| 59         | 3.366309                                  | 103        | 56.40963                                  |
| 60         | 3.614669                                  | 104        | 59.04661                                  |
| 61         | 3.880982                                  | 105        | 61.70409                                  |
| 62         | 4.166489                                  | 109        | 72.267                                    |
| 63         | 4.472506                                  | 113        | 81.98157                                  |
| 64         | 4.800431                                  |            |                                           |
| 65         | 5.151745                                  |            |                                           |
| 66         | 5.528015                                  |            |                                           |

HCC, hepatocellular carcinoma.
